# Supplementary material for: TMED inhibition suppresses cell surface PD-1 expression and overcomes T cell dysfunction
Source: PubMed Central journal article supplement (PMC11552591; doi:10.1136/jitc-2024-010145), 2024-11-07
Supplement: jitc-12-11-s004.pdf [file jitc-12-11-s004.pdf]

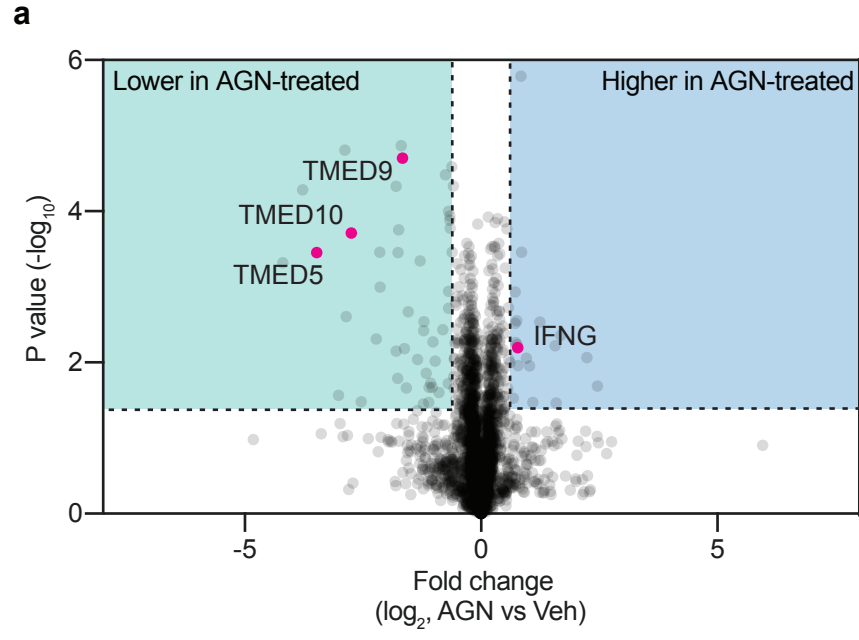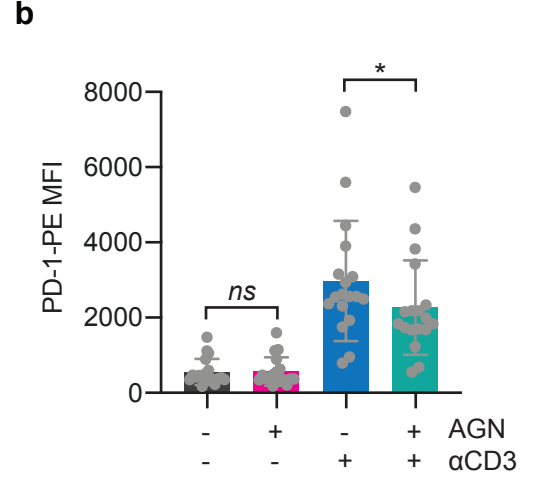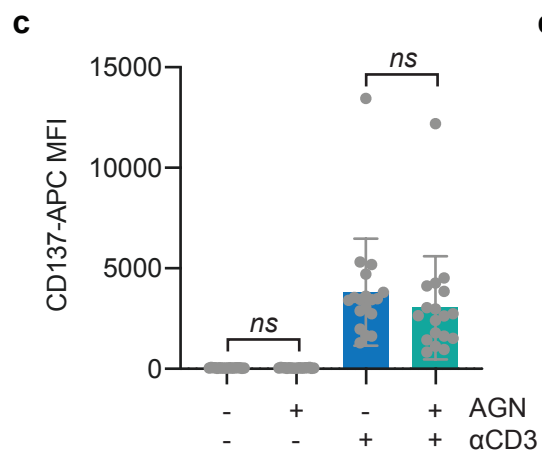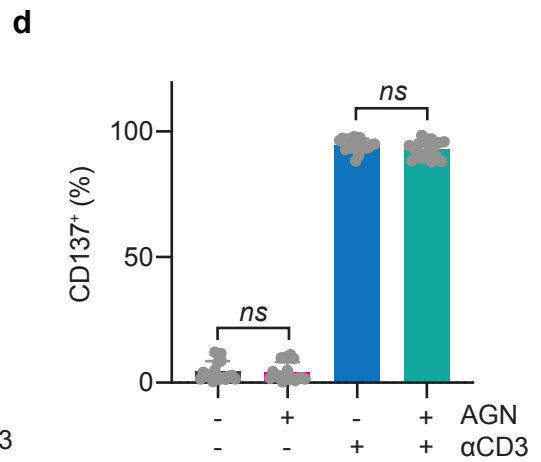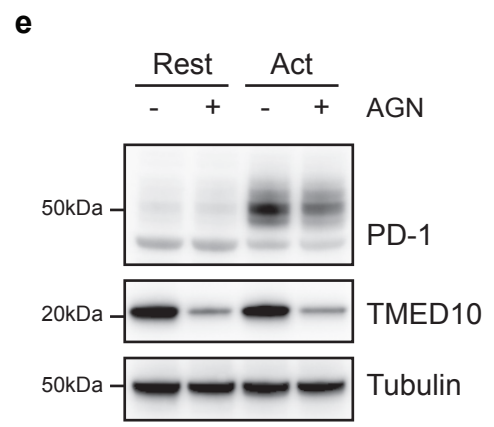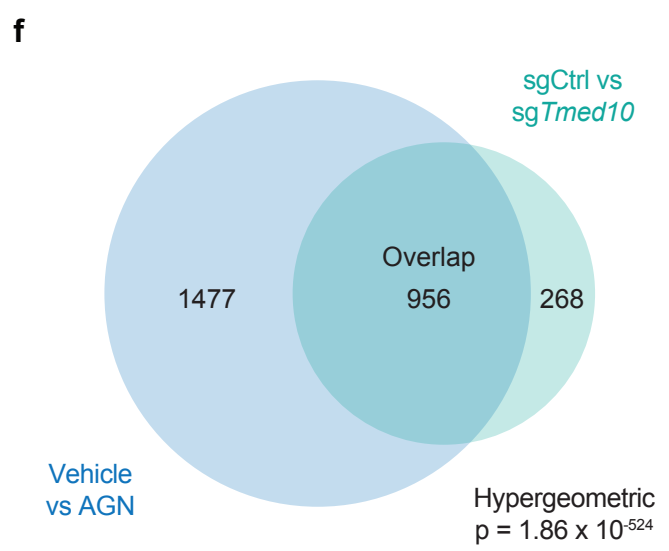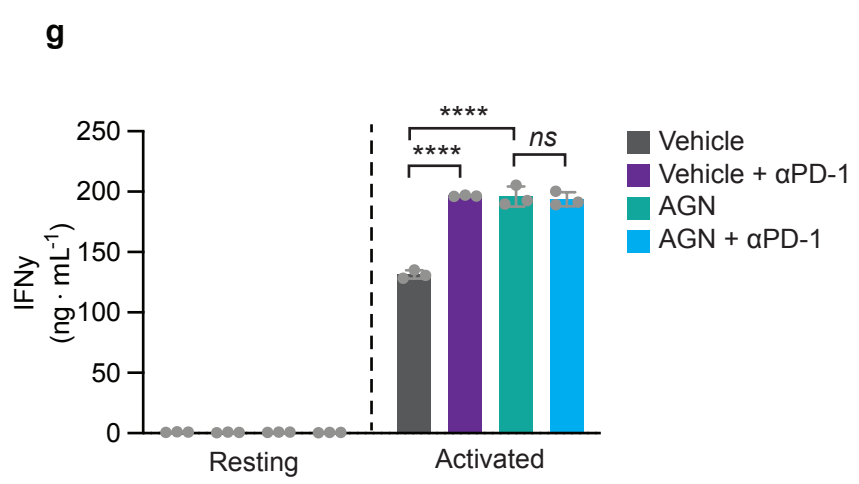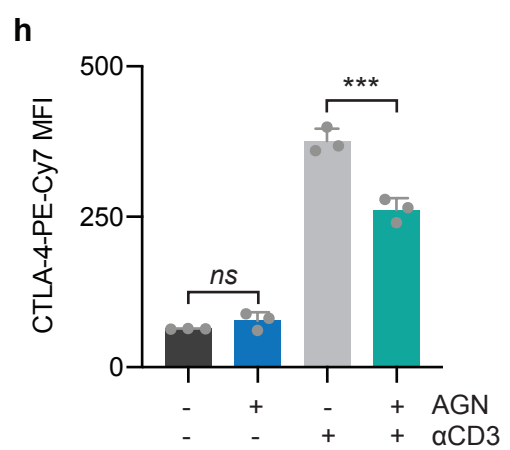

Supplementary Figure S4

Supplementary Figure S4. AGN192403 phenocopies Tmed10 KO in murine and human CD8 T cells.

- a. Proteomic differences between OT-I/Cas9 CD8 T cells treated with vehicle or AGN192403 (AGN, 100 $\mu$ M) after activation with anti-CD3 antibody for 24h as measured by mass spectrometry. The data is based on three independent spleens for each treatment. Statistical analysis was performed by a Student's t test.
- b. Quantification of PD-1-PE abundance by flow cytometry of resting and activated human CD8 T cells in the presence or absence of AGN192403 (AGN; 100 $\mu$ M). Each datapoint indicates data obtained with CD8 T cells from independent donors. Error bars denote SD. Statistical analysis was performed with a Friedman test, followed by a Dunn's post-hoc analysis.
- c. As in b, but for CD137-APC abundance.
- d. As in b, but for percentage of CD137+ cells.
- e. Western blot analysis of PD-1 and TMED10 abundance in OT-I/Cas9 CD8 T cells, before or after activation with anti-CD3 antibody for 24h in the presence or absence of AGN192403 (AGN; 100  $\mu$ M). The size markings indicate the size of the closest molecular weight marker.
- f. Overlap of significantly differentially expressed genes between activated OT-I/Cas9 CD8 T cells carrying either a non-targeting control sgRNA or an sgRNA targeting Tmed10 (green) and activated OT-I/Cas9 CD8 T cells treated with vehicle or AGN192403 (AGN; 100 $\mu$ M; blue). Statistical p-value was determined by hypergeometric test.
- g. Cytokine release of IFN $\gamma$  as measured by cytometric bead array of vehicle- or AGN192403-treated OT-I/Cas9 CD8 T cells, after activation, or not, with CD3-antibody in the presence or absence of PD-1 antibody (10  $\mu$ g/mL). Each datapoint indicates data obtained with CD8 T cells from an independent spleen. Error bars denote SD. Statistical analysis was performed with a one-way ANOVA, followed by a Tukey post-hoc test.
- h. Quantification of flow cytometry measurements for the abundance of CTLA-4-PE-Cy7 in resting and activated OT-I/Cas9 CD8 T cells treated with, or not, AGN192403. Each datapoint indicates data obtained with CD8 T cells from an independent spleen. Error bars denote SD. Statistics were performed with a Student t test for each activation condition.

\* P < 0.05; \*\* P < 0.01; \*\*\* P < 0.001; \*\*\*\* P < 0.0001.
