# Supplementary material for: TMED inhibition suppresses cell surface PD-1 expression and overcomes T cell dysfunction
Source: PubMed Central journal article supplement (PMC11552591; doi:10.1136/jitc-2024-010145), 2024-11-07
Supplement: jitc-12-11-s005.pdf [file jitc-12-11-s005.pdf]

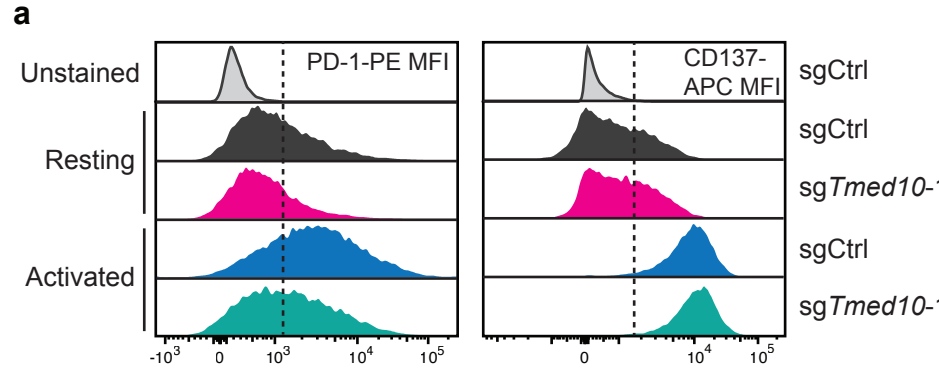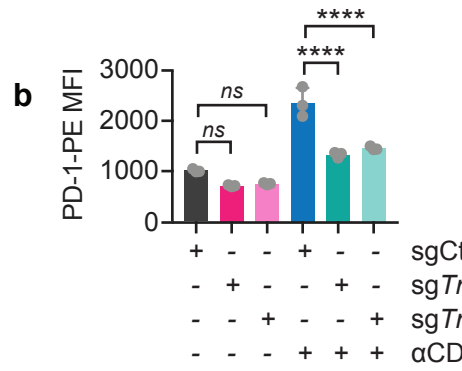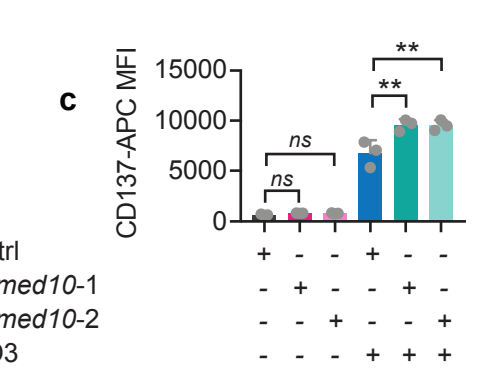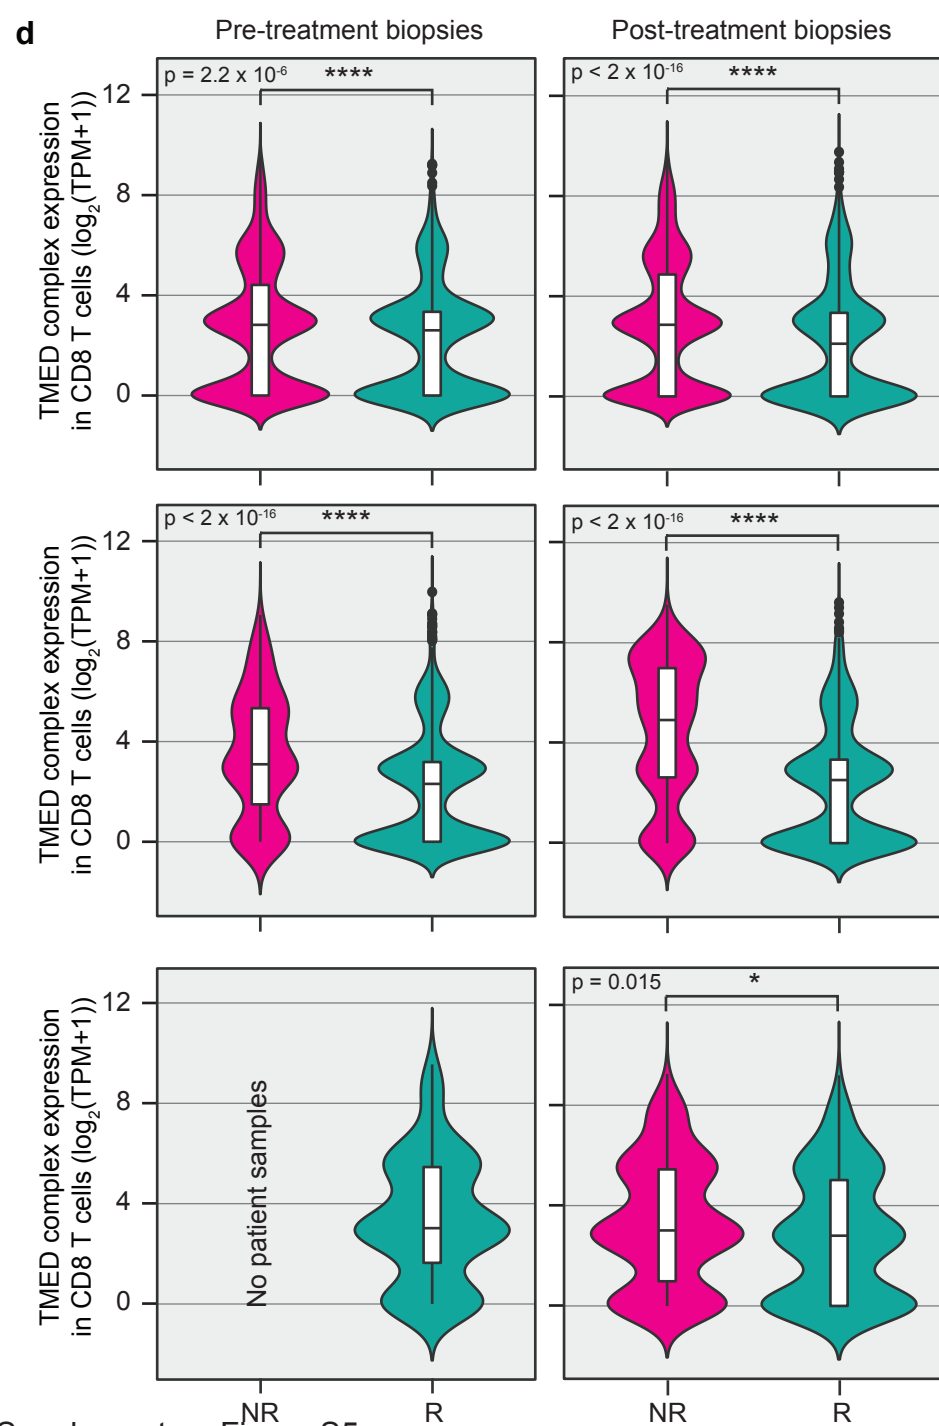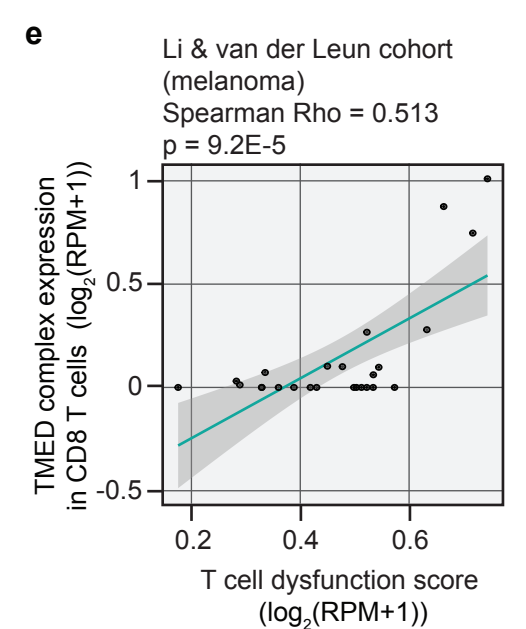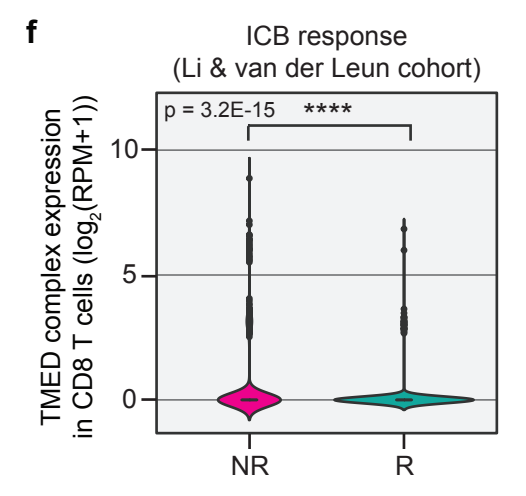

Supplementary Figure S5

Supplementary Figure S5. Detailed analysis of TMED complex abundance in human and mouse CD8 T cells.

- a. As Fig. 4a, but for PD-1-PE abundance (left) and CD137-APC abundance (right).
- b. As Fig. 4b, but for PD-1-PE abundance.
- c. As b, but for CD137-APC abundance.
- d. As Fig. 4e, but the cohort was split up based on time of biopsy and treatment regimen.
- e. As in Fig. 4c, but for the Li & van der Leun cohort18.
- f. As in Fig. 4e, but for the Li & van der Leun cohort18.

\* P < 0.05; \*\* P < 0.01; \*\*\* P < 0.001; \*\*\*\* P < 0.0001.
