# Supplementary material for: TMED inhibition suppresses cell surface PD-1 expression and overcomes T cell dysfunction
Source: PubMed Central journal article supplement (PMC11552591; doi:10.1136/jitc-2024-010145), 2024-11-07
Supplement: jitc-12-11-s008.pdf [file jitc-12-11-s008.pdf]

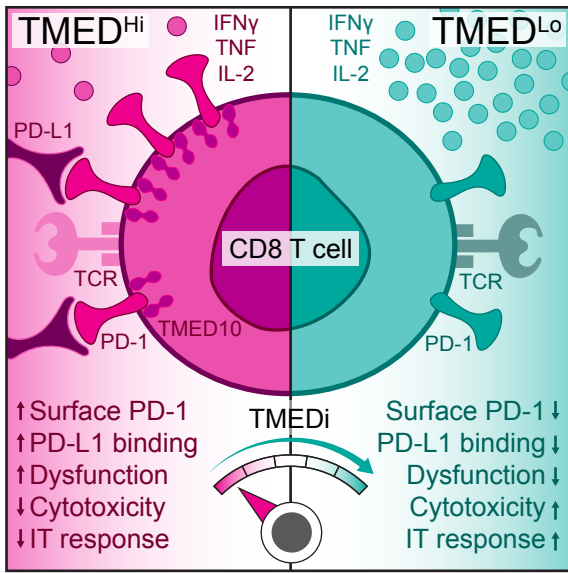

Supplementary Figure S8. TMED10 controls T cell (dys)function by regulating cell-surface PD-1 abundance. TCR, T cell receptor; IT, immunotherapy.
