# Supplementary material for: TMED inhibition suppresses cell surface PD-1 expression and overcomes T cell dysfunction
Source: PubMed Central journal article supplement (PMC11552591; doi:10.1136/jitc-2024-010145), 2024-11-07
Supplement: jitc-12-11-s009.pdf [file jitc-12-11-s009.pdf]

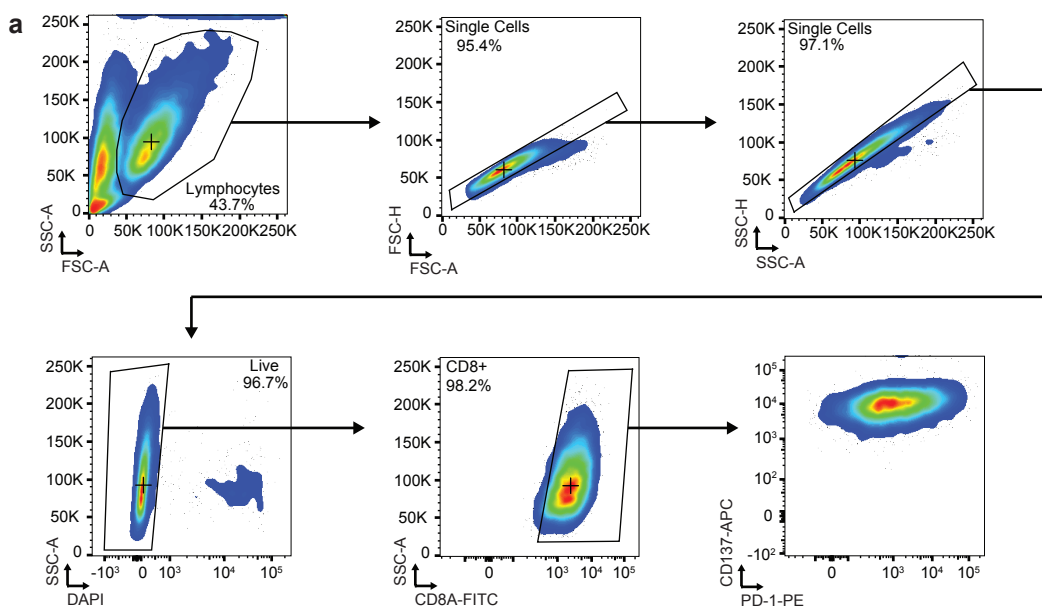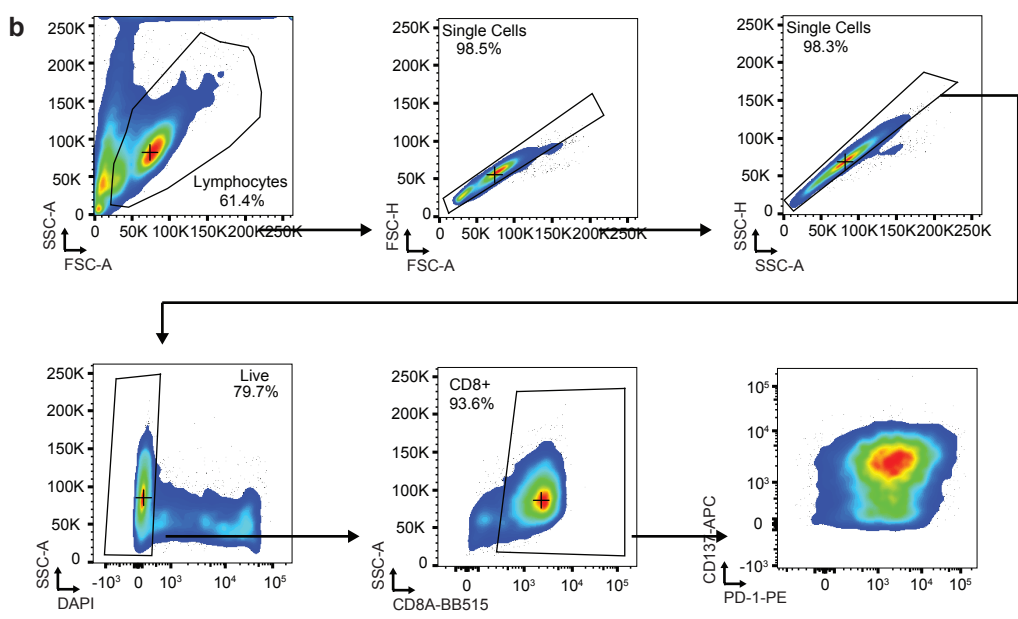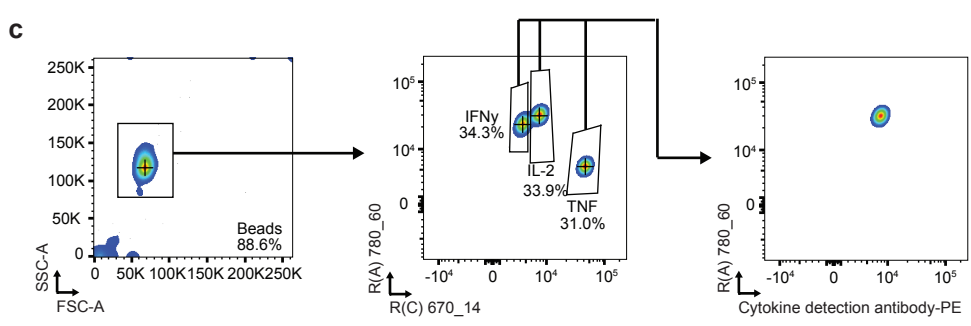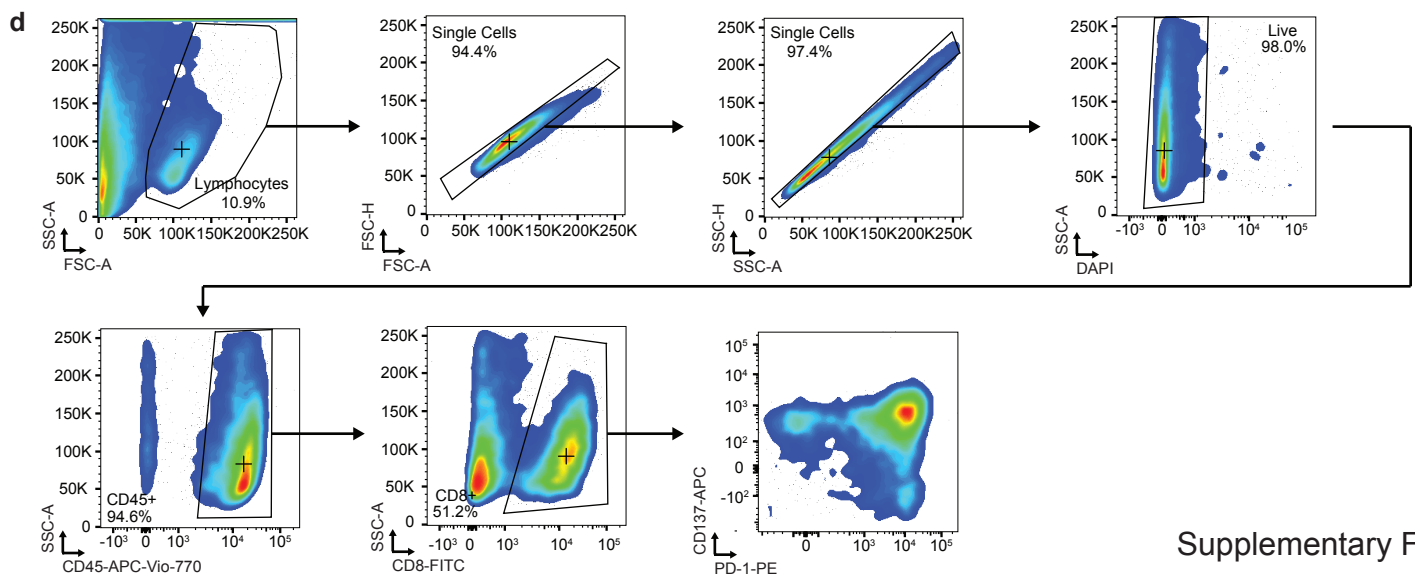

Supplementary Figure S9

Supplementary Figure S9. Gating strategy for FACS experiments.

- a. Gating strategy corresponding to Figures 1e-g, 2b, 2c, 3b-e, 4a, b and Extended Data Figures 1b-e, k-o, 3f, 4h and 5a-c.
- b. Gating strategy corresponding to Extended Data Figures 4b-d.
- c. Gating strategy corresponding to Figures 2g, 3j and Extended Data Figures 2l and 4g.
- d. Gating strategy corresponding to Figures 5b-d, 5h and Extended Data Figures 6a, 6b, and 7a-c.
