# Supplementary material for: TMED inhibition suppresses cell surface PD-1 expression and overcomes T cell dysfunction
Source: PubMed Central journal article supplement (PMC11552591; doi:10.1136/jitc-2024-010145), 2024-11-07
Supplement: jitc-12-11-s014.pdf [file jitc-12-11-s014.pdf]

| Identifier                    | Sequence (5'-3')                                                                                                   |
|-------------------------------|--------------------------------------------------------------------------------------------------------------------|
| Sequencing primer, Brie_Fw    | AATGATACGGCGACCACCGAGAT<br>CTACACTCTTTCCCTACACGACGC<br>TCTTCCGATCTNNNNNNGGCTTTA<br>TATATCTTGTGGAAAGGACGAAAC<br>ACC |
| Sequencing primer, Brie_Rv    | CAAGCAGAAGACGGCATAACGAGA<br>TCCGACTCGGTGCCATTTTTCAA                                                                |
| Non-targeting control sgRNA   | GTATTACTGATATTGGTGGG                                                                                               |
| <i>Pdcd1</i> sgRNA            | GCTCAAACCATTACAGAAGG                                                                                               |
| <i>Tmed2</i> sgRNA 1          | CCGCTCGAAGAAGCACTCCT                                                                                               |
| <i>Tmed2</i> sgRNA 2          | GGACAAGACATGGAGACAGA                                                                                               |
| <i>Tmed9</i> sgRNA 1          | GAAATACAGCGCGCTTCCGC                                                                                               |
| <i>Tmed9</i> sgRNA 2          | GTCATCGGTGCGGGGGCGCA                                                                                               |
| <i>Tmed10</i> sgRNA 1         | CTCTCGCAAGTGTCTCCGAG                                                                                               |
| <i>Tmed10</i> sgRNA 2         | AAACATGTCATAGTCTTCCG                                                                                               |
| qPCR primer, <i>Pdcd1</i> -Fw | TGGTCATTCACTTGGGCTGT                                                                                               |
| qPCR primer, <i>Pdcd1</i> -Rv | TGGGTAGAAGGTGAGGGACC                                                                                               |
| qPCR primer, <i>Actb1</i> -Fw | GATCTGGCACCACACCTTCT                                                                                               |
| qPCR primer, <i>Actb1</i> -Rv | GGGGTGTGGAAGGTCTCAA                                                                                                |
