# Supplementary material for: TMED inhibition suppresses cell surface PD-1 expression and overcomes T cell dysfunction
Source: PubMed Central journal article supplement (PMC11552591; doi:10.1136/jitc-2024-010145), 2024-11-07

Figure 1H

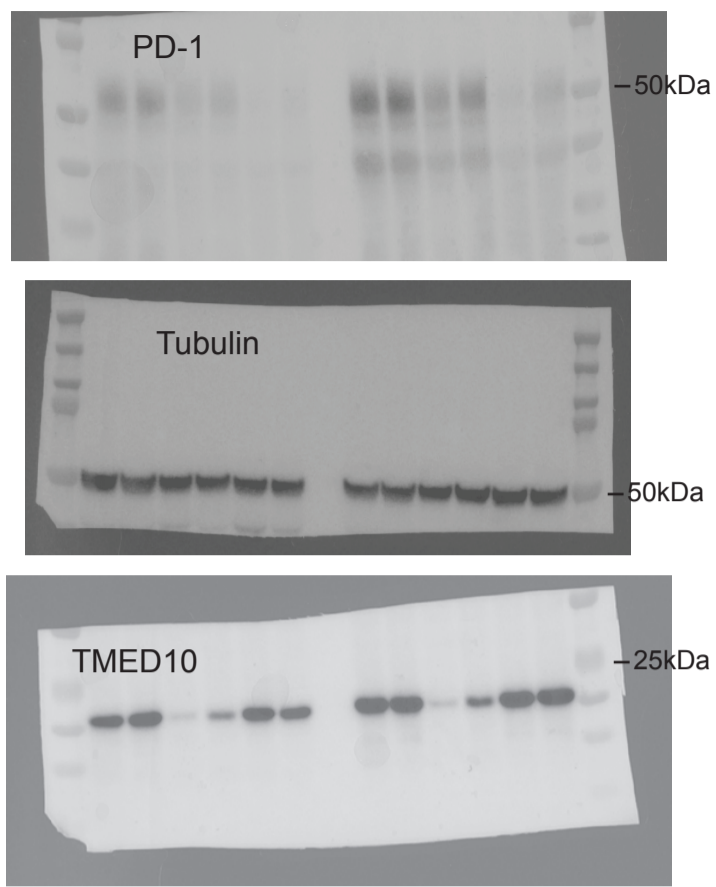

Figure 2I

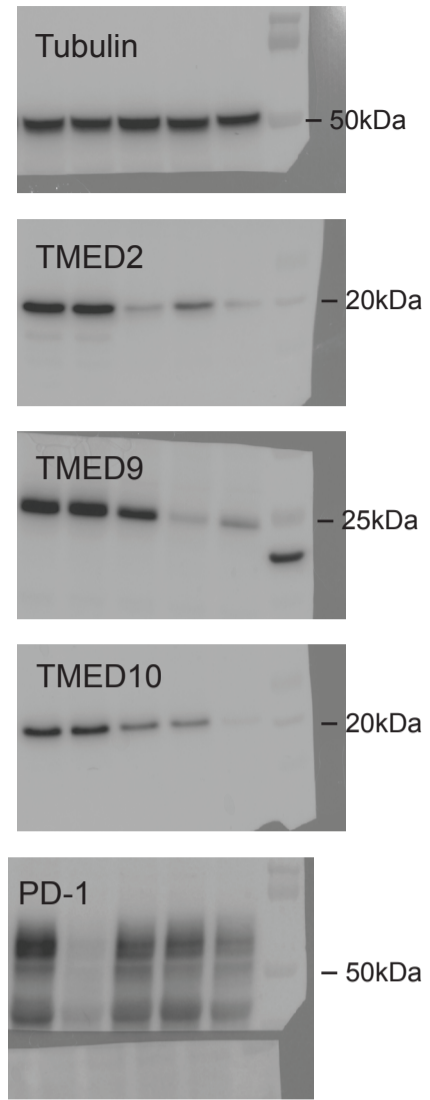

Figure 3A

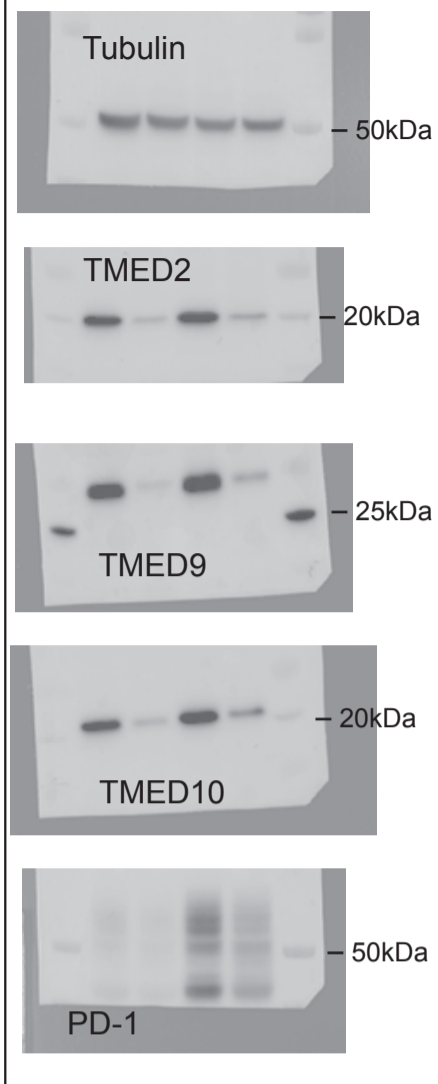

Figure 3F

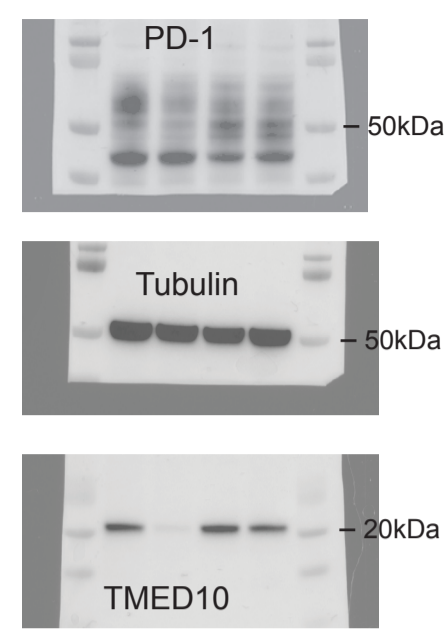

Figure 5F

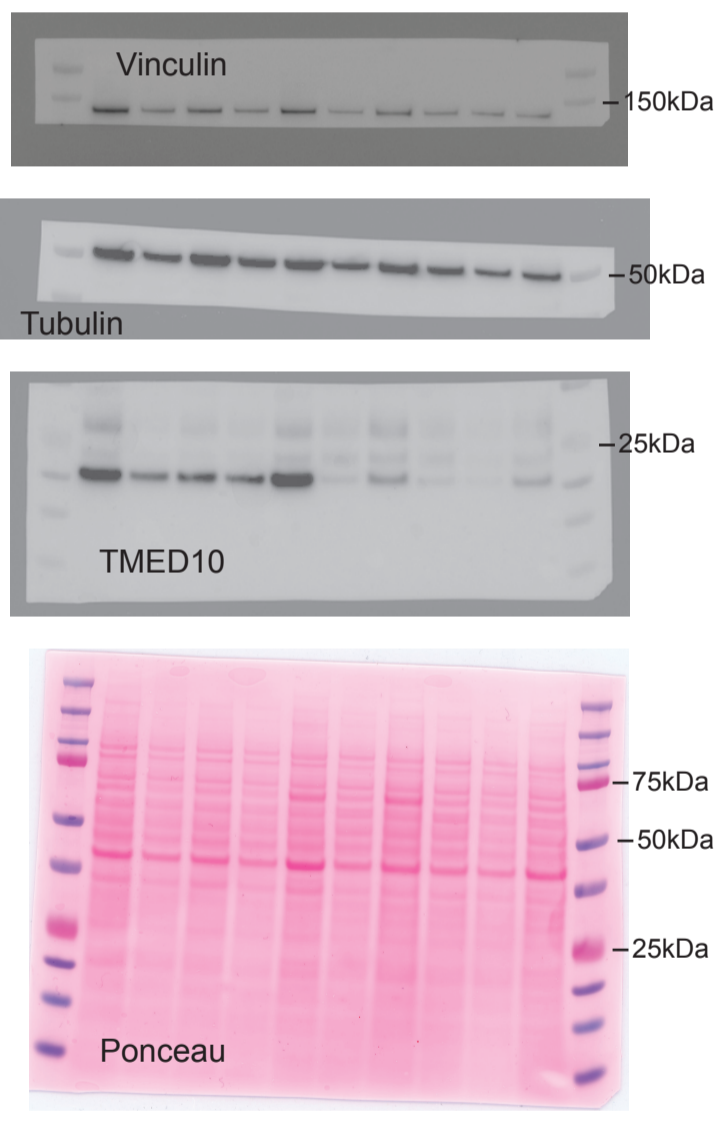

Figure S10

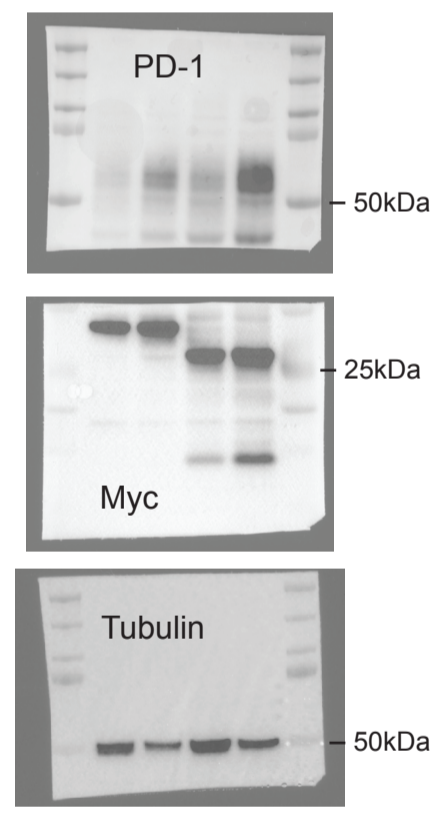

Figure S2B

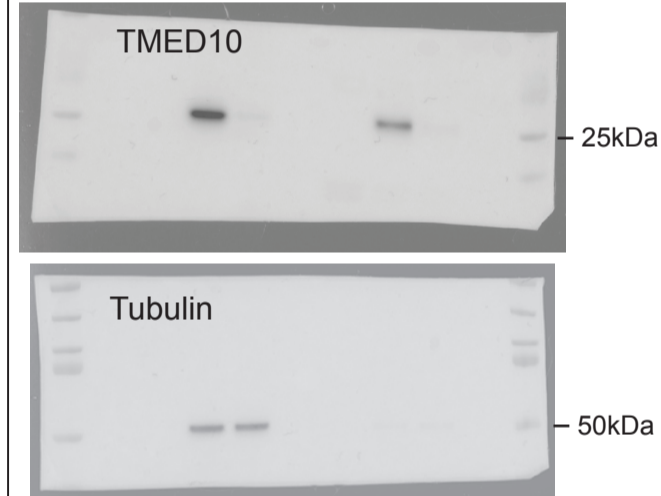

Figure S2E

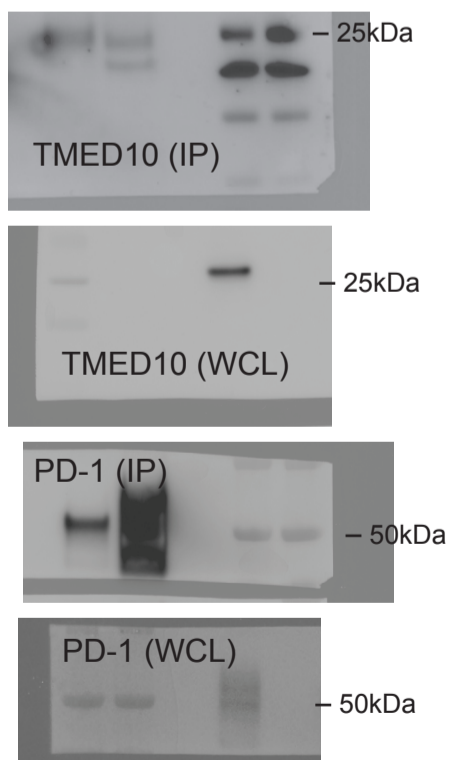

Figure S3E

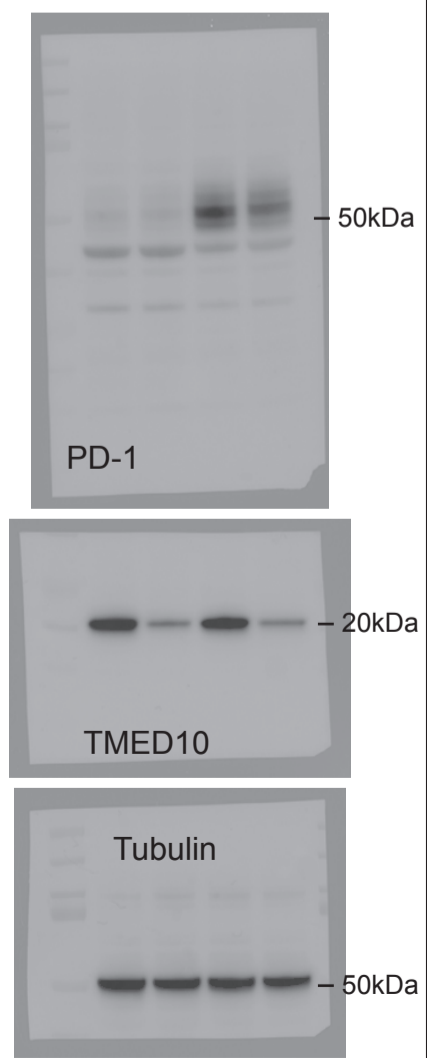

Supplement: jitc-12-11-s016.pdf [file jitc-12-11-s016.pdf]
